# Supplementary material for: Weakly aligned Ti3C2TxMXene liquid crystals: measuring residual dipolar coupling in multiple co-solvent systems
Source: Royal Society of Chemistry journal article supplement (doi:10.1039/d3nr00204g), 2023-01-01
Supplement: d3nr00204g1.pdf [file d3nr00204g1.pdf]

**Electronic supplementary information**

*for*

**Weakly aligned  $Ti_3C_2T_x$  MXene liquid crystal: Measuring residual dipolar couplings in multiple co-solvent systems**

You Zhao,<sup>‡a,b</sup> Huan Qin,<sup>‡a,b</sup> Yan-Ling Yang,<sup>‡c</sup> Jia-Qian Li,<sup>c</sup> Si-Yong Qin,<sup>\*,a,b</sup> Ai-Qing Zhang,<sup>\*,a,b</sup> & Xinxiang Lei<sup>\*,c</sup>

<sup>a</sup>Hubei Engineering Technology Research Centre of Energy Polymer Materials, School of Chemistry and Materials Science, South-Central Minzu University, Wuhan 430074, China

<sup>b</sup>Key Laboratory of Catalysis and Energy Materials Chemistry of Ministry of Education and Hubei Key Laboratory of Catalysis and Materials Science, South-Central Minzu University, Wuhan, China

<sup>c</sup>School of Pharmaceutical Sciences, South-Central Minzu University, Wuhan, China

Corresponding Author: sy-qin@mail.scuec.edu.cn; aizhang@scuec.edu.cn;

xxlei@mail.scuec.edu.cn

## Supplementary Information

---

### TABLE OF CONTENTS

|                                                                                                |    |
|------------------------------------------------------------------------------------------------|----|
| Materials .....                                                                                | 3  |
| Characterization .....                                                                         | 3  |
| Synthesis of $Ti_3C_2T_x$ MXene .....                                                          | 3  |
| Preparation of samples for NMR experiments.....                                                | 4  |
| NMR experiments.....                                                                           | 5  |
| Note about the computation of 3D conformations and anisotropic NMR data analysis by MSpin..... | 6  |
| Characterization of $Ti_3C_2T_x$ MXene .....                                                   | 7  |
| NMR Data.....                                                                                  | 8  |
| MSpin output Data.....                                                                         | 32 |

## Materials

Hydrochloric acid (HCl, 36%) was purchased from Shanghai Runjie Chemical Reagent Co., Ltd. Lithium fluoride (LiF, 99%) was purchased from Aladdin Reagent (Shanghai) Co., Ltd.  $\text{Ti}_3\text{AlC}_2$  (99%, 400 mesh) was brought from Shandong Xiyan New Material Technology Co., Ltd. L-camphor, artemether, estrone and gibberellin were purchased from Aladdin Reagent Co. Ltd (Shanghai, China). L-Proline, (+)-IPC and Boc-D-tryptophan were provided from Aladdin Reagent Co. Ltd (Shanghai, China). Methanol- $d_4$  ( $\text{CD}_3\text{OD}$ ), Dimethyl- $d_6$  sulphoxide + 0.03% TMS (v/v) ( $\text{DMSO-}d_6$ ), Deuterium oxide ( $\text{D}_2\text{O}$ ), N,N-Dimethylformamide- $d_7$  ( $\text{DMF-}d_7$ ) and Acetone- $d_6$  ( $\text{CD}_3\text{COCD}_3$ ) were purchased from Cambridge Isotope Laboratories, Inc. All materials are reagent grade and used as received without further purification.

## Characterization

A D8 diffractometer with a Cu  $\text{K}\alpha$  radiation source was used for X-ray diffraction with a scanning step size of  $0.02^\circ$  and a time step of 0.5 s, within the  $2\theta$  range of  $3.5\text{-}80^\circ$ . The surface electronic states of MXA ( $\text{Ti}_3\text{AlT}_x$  powder) and MXene ( $\text{Ti}_3\text{C}_2\text{T}_x$  powder) were analyzed by X-ray photoelectron spectroscopy (MULTILAB2000, America). Dynamic light scattering (DLS) and  $\zeta$ -potential measurements were read on a Zeta-sizer Nano ZS (Malvern Instruments). Scanning electron microscopy (SEM) images were performed on a field-emission microscope (SU8010, Japan). The NMR spectra were obtained by the Bruker Ascend IITM 600 MHz NMR spectrometer. The morphology of MXene was further imaged by scanning transmission electron microscopy (TALOS F200X, Thermo Fisher Scientific Co., Ltd.).

## Synthesis of $\text{Ti}_3\text{C}_2\text{T}_x$ MXene

14 mL of HCl (12 M) and 1.4 g of LiF were stirred continuously at 35°C for 5 min. Subsequently, 0.7 g of MAX (Ti<sub>3</sub>AlC<sub>2</sub> powder) was added slowly to the mixture, and the etching reaction was carried out for three days at 45°C. After the reaction was completed, the mixture was centrifuged and washed three times with 1 M HCl to remove unreacted LiF. After that, the Ti<sub>3</sub>C<sub>2</sub>T<sub>x</sub> precipitate was repeatedly washed with deionized water and centrifuged at 12000 r/min for 1 min, until the pH value of Ti<sub>3</sub>C<sub>2</sub>T<sub>x</sub> dispersion exceeded 5. The precipitate was further redispersed in 30 mL deionized water by shaking. The obtained dispersion was then subjected to the sonication in an ice bath for 30 min under nitrogen protection. The upper layer solution was collected by centrifuging at 3500 r/min for 30 min. The collected solution was lyophilized to obtain the Ti<sub>3</sub>C<sub>2</sub>T<sub>x</sub> solid.

## **Preparation of samples for NMR experiments**

### **<sup>2</sup>H NMR spectra of the anisotropic LC samples with different Ti<sub>3</sub>C<sub>2</sub>T<sub>x</sub> MXene concentrations in water phase**

25 mg of Ti<sub>3</sub>C<sub>2</sub>T<sub>x</sub> solid were added into 500 μL of H<sub>2</sub>O (containing 10% D<sub>2</sub>O) in a 5 mm NMR tube, which was subjected to the sonication with a high-power NC ultrasonic cleaner (KQ-400 KDE, 40 kHz, 400 W) to generate 50 mg/mL MXene dispersion. The stock solution was diluted with H<sub>2</sub>O (containing 10% D<sub>2</sub>O) to generate the needed concentrations for the <sup>2</sup>H NMR experiments.

### **<sup>2</sup>H quadrupolar splitting of different co-solvent systems in Ti<sub>3</sub>C<sub>2</sub>T<sub>x</sub> MXene LCs**

1) DMSO-*d*<sub>6</sub>/D<sub>2</sub>O phase: Taking the 80% DMSO-*d*<sub>6</sub> co-solvent phase as an example, 10 mg of Ti<sub>3</sub>C<sub>2</sub>T<sub>x</sub> was dispersed with 100 μL D<sub>2</sub>O in the a 5 mm NMR tube by a high-power NC ultrasonic cleaner (KQ-400 KDE, 40 kHz, 400 W) for a few seconds. Then 400 μL of DMSO-*d*<sub>6</sub> was further added to create the co-solvent system with the help of a sonication for 4 h. The other samples, such

as 20%, 40% and 60% (v/v) of DMSO- $d_6$ , were prepared according to the above method through adjusting the solvent ratio.

2) CD<sub>3</sub>OD/D<sub>2</sub>O phase: 600  $\mu$ L of D<sub>2</sub>O and 60 mg of lyophilized Ti<sub>3</sub>C<sub>2</sub>T<sub>x</sub> were added into a 10 mL EP tube and subjected to the sonication treatment for a few seconds, then 2400  $\mu$ L of CD<sub>3</sub>OD was added to the above system. Sonication was applied by ultrasonic homogenizer JY92-IIN for 15 min under a pulse setting (5 s on and 5 s off at 50% amplitude), providing 20 mg/mL Ti<sub>3</sub>C<sub>2</sub>T<sub>x</sub> MXene solution in co-solvent. 450  $\mu$ L of the above solution was added into a 5 mm NMR tube for the NMR experiment.

3) DMF- $d_7$ /D<sub>2</sub>O phase: The sample preparation method is the same as that for the co-solvent of DMSO- $d_6$ /D<sub>2</sub>O.

4) acetone- $d_6$ /D<sub>2</sub>O: 250  $\mu$ L of D<sub>2</sub>O and 10 mg of Ti<sub>3</sub>C<sub>2</sub>T<sub>x</sub> were added into a 5 mm NMR tube, followed by the sonication treatment for about 2 min, then 250  $\mu$ L of acetone- $d_6$  was used to accomplish the co-solvent system after the sonication by a high-power NC ultrasonic cleaner (KQ-400 KDE, 40 kHz, 400 W) for 4 h.

## **NMR experiments**

Without the special instruction, NMR spectra were obtained at 295 K by a Bruker Ascend IITM 600 MHz NMR spectrometer. The spectrometer was equipped with a 5 mm CPPBBO forward broadband liquid nitrogen cryogenic probe. One-dimensional <sup>1</sup>H NMR spectra were collected in eight scans using locked channel recording. To obtain two-dimensional [<sup>1</sup>H, <sup>13</sup>C]-CLIP-HSQC spectra, the acquisition time (AQ) was 0.327 seconds and the relaxation delay (RD) was 2.00 seconds. The spectral width (SW) was 10.0 ppm (<sup>1</sup>H) or 140 ppm (<sup>13</sup>C) during each spectrum. When the spectral width was 10 ppm, a total of 4k indirect dimensional data points were collected.

Chemical shift ( $\delta$ ) values were given in parts per million (ppm), while coupling constants and RDCs were expressed in hertz (Hz). The  $^{13}\text{C}$ - $^1\text{H}$  one-bond coupling constant was 145.0 Hz. F1 was set to 0.3 Hz and F2 to 1 Hz before the Fourier transform was performed. NMR data were obtained and processed by Bruker Topspin 3.5 pl 6 and MSpin software (Mestrelab Research). The published methods were used to estimate the errors of experimental C-H couplings.<sup>1,2</sup>

### **Note about the computation of 3D conformations and anisotropic NMR data analysis by MSpin**

The single-tensor ensemble fitting approach is adopted to the large-amplitude conformational jumping between different energy minima. Therefore, when more than one conformation with the lowest-energy for organic molecules such as L-proline and Boc-D-tryptophan is present, the single-tensor SVD (Singular Value Decomposition) approach is used to analyze RDCs for flexible systems in MSpin and the molecules were rotated to maximize the superimposition of atom coordinates for defining a common frame. At the same time, the SVD approach provides the best minimum squares solution according to the experimental data.<sup>3</sup>

After drawing the chemical structure in ChemDraw, the file was imported in ChemDraw 3D. Then select the ‘Calculations/MM2/Minimize Energy command’ to optimize the molecular mechanics of the MM2 configuration in ChemDraw 3D, and the optimised structures were saved in mol2 file. These files were imported in Sybyl (Trepas) for conformer research, performed a minimization with MMFF and saved the coordinates in a.sdf file. Then the redundant structures from the Sybyl output were removed when the energy was positive. The geometry optimization and free-energy calculation were performed in Gaussian View 06 (at B3LYP/6 31 G(d) basis group level, IEFPCM solvatised model, ‘solvent’). The self-consistent field DFT energies was retrieved

from the Gaussian View 06 files in MSpin, so the calculation of Boltzmann populations can be computed.<sup>4</sup> The NVT ensemble (number of particles, volume, and temperature) was selected to calculate Boltzmann populations. Furthermore, we obtained the retention of the lowest energy set that can be formed from one to several tens of conformers, due to the cut-off value of 2 kcal/mol. These preserved conformations were imported into MSpin, and their corresponding Boltzmann constants were pasted into the corresponding positions. After loading the RDC input file, the  $Q$  values were calculated with performing a single-tensor SVD in MSpin. The good data quality means that a  $Q$  value is typically lower than 0.2 for the right structure.

### Characterization of $\text{Ti}_3\text{C}_2\text{T}_x$ MXene

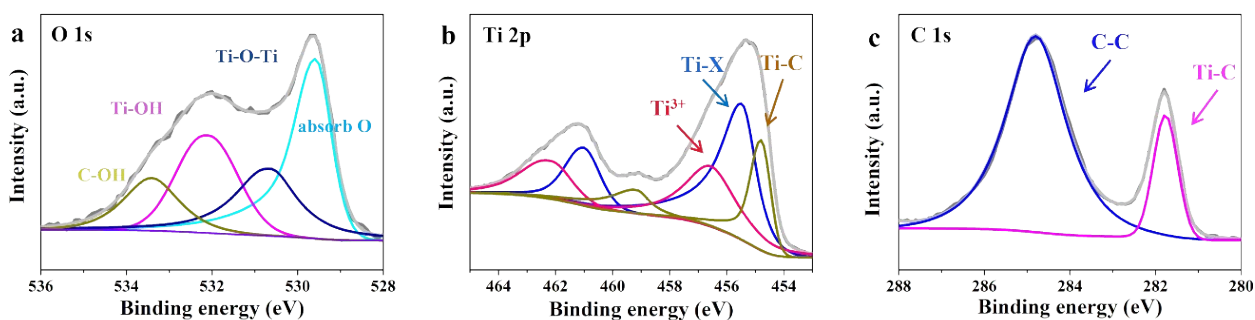

**Fig. S1.** The XPS spectra of  $\text{Ti}_3\text{C}_2\text{T}_x$  MXene. (a) The O 1s spectra, (b) The Ti 2p spectra and (c) C 1s spectra.

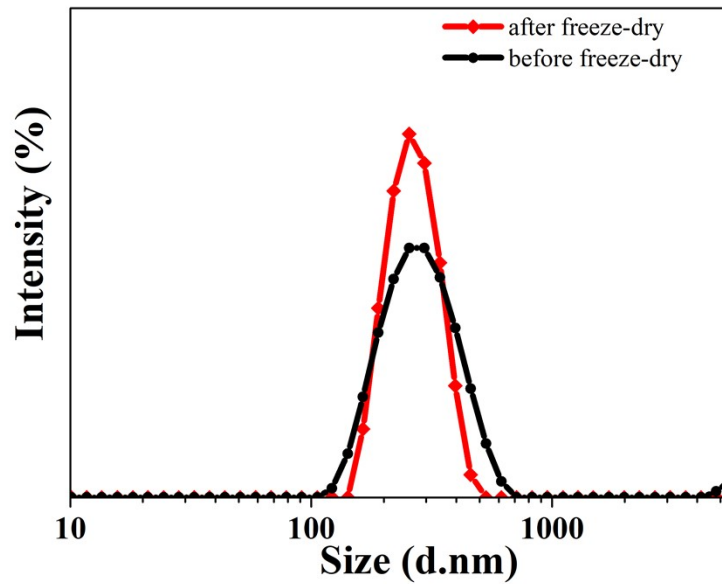

**Fig. S2.** The size of  $\text{Ti}_3\text{C}_2\text{T}_x$  nanosheet before (black) and after (red) the freeze dry.

### NMR Data

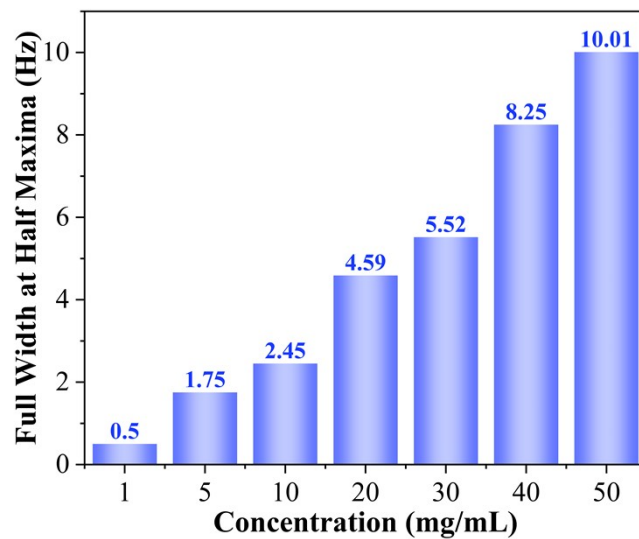

**Fig. S3.** The full width at half maxima of  $^2\text{H}$  quadrupolar splittings with different  $\text{Ti}_3\text{C}_2\text{T}_x$  concentrations in  $\text{D}_2\text{O}$ .



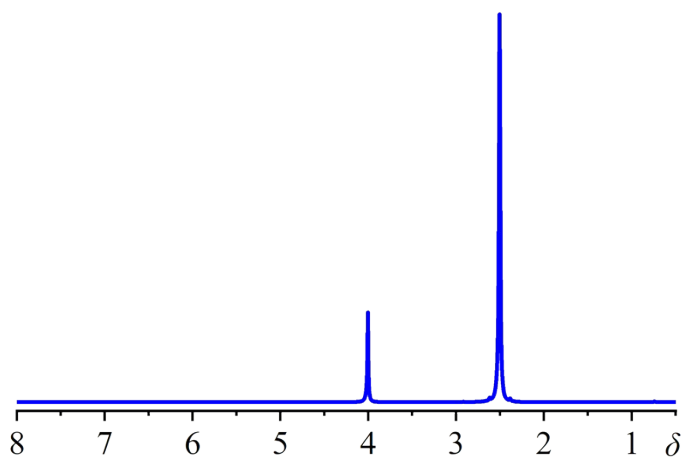

**Fig. S4.**  $^1\text{H}$  NMR of  $\text{Ti}_3\text{C}_2\text{T}_x$  (2 wt%) in  $\text{DMSO-}d_6/\text{D}_2\text{O}$  ( $\text{DMSO-}d_6 : \text{D}_2\text{O}=4:1$ ).

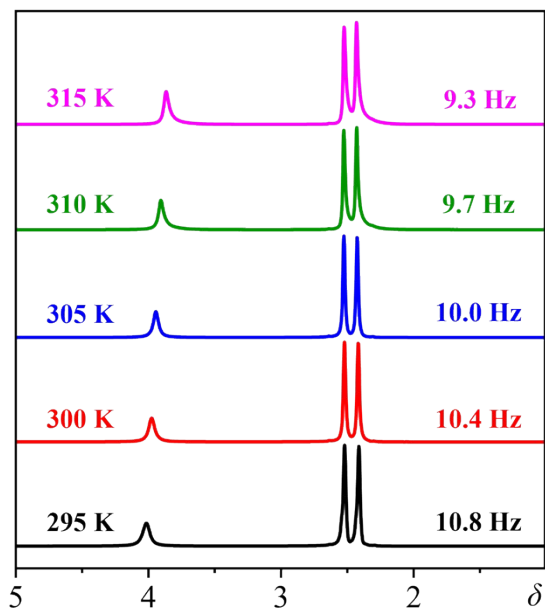

**Fig. S5.** 1D  $^2\text{H}$  NMR spectra of  $\text{Ti}_3\text{C}_2\text{T}_x$  LC (2 wt%) in  $\text{DMSO-}d_6/\text{D}_2\text{O}$  ( $\text{DMSO-}d_6 : \text{D}_2\text{O}=4:1$ ) with increased temperature from 295 K to 315 K.

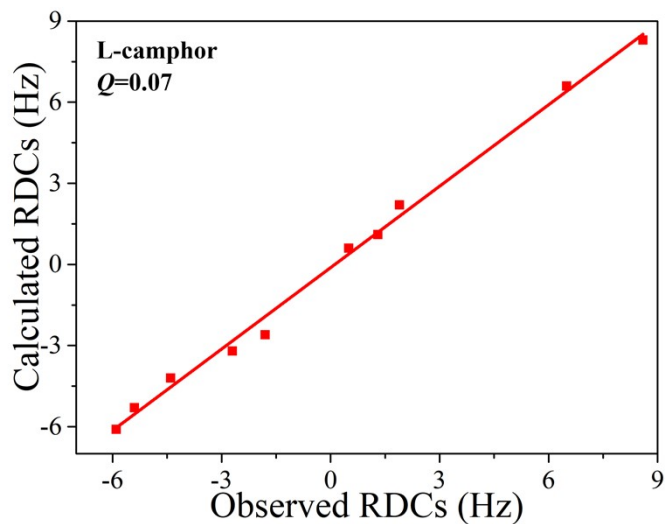

**Fig. S6.** Correlation between the experimental RDC values and calculated ones of L-camphor in the DMSO- $d_6$ /D<sub>2</sub>O bearing Ti<sub>3</sub>C<sub>2</sub>T<sub>x</sub> MXene LC (2 wt%, DMSO- $d_6$  : D<sub>2</sub>O=4:1).

**Table S1.** The scalar coupling value, compound coupling value, experimental RDCs and theoretical RDCs of L-camphor in DMSO- $d_6$ /D<sub>2</sub>O bearing Ti<sub>3</sub>C<sub>2</sub>T<sub>x</sub> LC phase (2 wt%, DMSO- $d_6$  : D<sub>2</sub>O=4:1).

| Atom number | $^1J_{CH}$ | $^1T_{CH}$ | $^1D_{CH}$ | $^1D_{CH}$ Calculation |
|-------------|------------|------------|------------|------------------------|
| C3H3a       | 128.8±0.4  | 130.1±0.2  | 1.3±0.6    | 1.1                    |
| C3H3b       | 133.6±0.5  | 128.2±0.1  | -5.4±0.6   | -5.3                   |
| C4H4        | 137.9±0.4  | 146.5±0.1  | 8.6±0.5    | 8.3                    |
| C5H5a       | 134.2±0.3  | 128.3±0.3  | -5.9±0.6   | -6.1                   |
| C5H5b       | 133.9±0.2  | 131.2±0    | -2.7±0.2   | -3.2                   |
| C6H6a       | 131.4±0.2  | 137.9±0.3  | 6.5±0.5    | 6.6                    |
| C6H6b       | 135.1±0.5  | 130.7±0.2  | -4.4±0.7   | -4.2                   |

|            |           |           |          |      |
|------------|-----------|-----------|----------|------|
| C8H8(Me)   | 124.8±0   | 126.7±0.3 | 1.9±0.3  | 2.2  |
| C9H9(Me)   | 125.9±0.2 | 126.4±0.0 | 0.5±0.2  | 0.6  |
| C10H10(Me) | 125.0±0.8 | 123.2±0.1 | -1.8±0.9 | -2.6 |

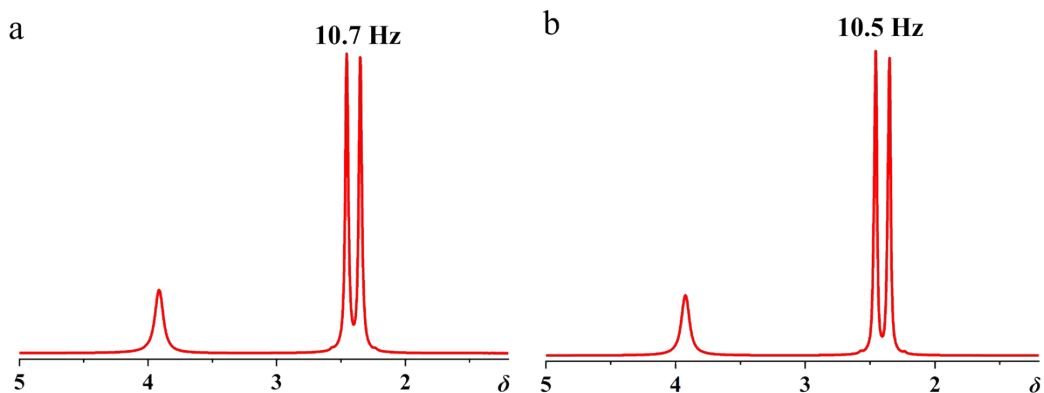

**Fig. S7.** The quadrupolar DMSO- $d_6$  and D<sub>2</sub>O splittings before (a) and after (b) adding artemether in the anisotropic sample of DMSO- $d_6$ /D<sub>2</sub>O bearing Ti<sub>3</sub>C<sub>2</sub>T<sub>x</sub> LC phase (2 wt%, DMSO- $d_6$  : D<sub>2</sub>O=4:1).

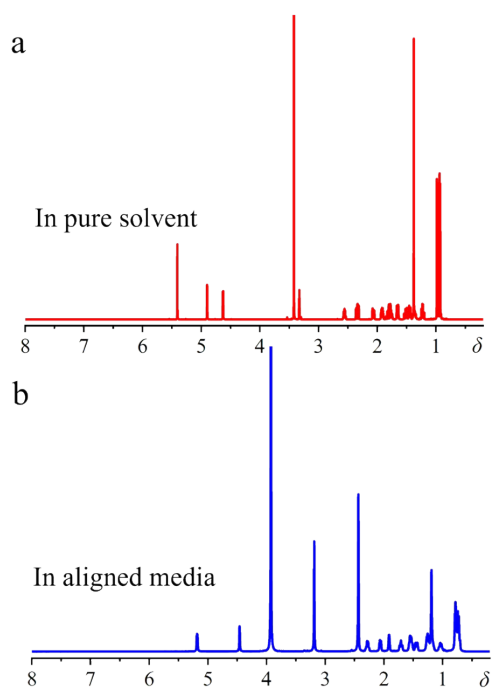

**Fig. S8.**  $^1\text{H}$  spectra of artemether in (a) pure solvent (DMSO- $d_6$ /D $_2$ O=4:1) and (b) DMSO- $d_6$ /D $_2$ O bearing  $\text{Ti}_3\text{C}_2\text{T}_x$  LC medium (2 wt%, DMSO- $d_6$ /D $_2$ O=4:1).

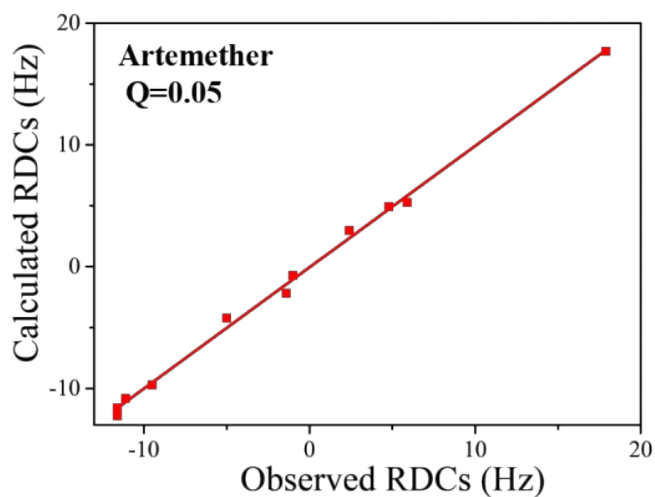

**Fig. S9.** Correlation between the experimental RDC values and calculated ones of artemether in the DMSO- $d_6$ /D $_2$ O bearing  $\text{Ti}_3\text{C}_2\text{T}_x$  MXene LC (2 wt%, DMSO- $d_6$  : D $_2$ O=4:1).

**Table S2.** The scalar coupling value, compound coupling value, experimental RDCs and theoretical RDCs of artemether in DMSO- $d_6$ /D<sub>2</sub>O bearing Ti<sub>3</sub>C<sub>2</sub>T<sub>x</sub> LC phase (2 wt%, DMSO- $d_6$  : D<sub>2</sub>O=4:1).

| Atom number | $^1J_{\text{CH}}$ | $^1T_{\text{CH}}$ | $^1D_{\text{CH}}$ | $^1D_{\text{CH}}$ Calculation |
|-------------|-------------------|-------------------|-------------------|-------------------------------|
| C1H1        | 126.0±0.0         | 130.8±0.1         | 4.8±0.1           | 4.9                           |
| C3H3a       | 126.6±0.7         | 144.5±0.1         | 17.9±0.8          | 17.7                          |
| C3H3b       | 128.5±0.3         | 127.5±0.1         | -1.0±0.4          | -0.7                          |
| C5H5        | 168.0±0.2         | 156.9±0.3         | -11.1±0.5         | -10.8                         |
| C9H9a       | 128.1±0.7         | 116.5±0.4         | -11.6±1.1         | -11.6                         |
| C9H9b       | 123.3±0.4         | 129.2±0.2         | 5.9±0.6           | 5.3                           |
| C11H11      | 127.2±0.3         | 115.6±0.2         | -11.6±0.5         | -12.3                         |
| C12H12      | 165.0±0.3         | 155.5±0.2         | -9.5±0.5          | -9.7                          |
| C13H13(Me)  | 126.3±0.2         | 121.3±0.3         | -5.0±0.5          | -4.2                          |
| C14H14(Me)  | 125.1±0.2         | 127.5±0.5         | 2.4±0.7           | 3.0                           |
| C15H15(Me)  | 129.5±0.3         | 128.1±0.4         | -1.4±0.7          | -2.2                          |

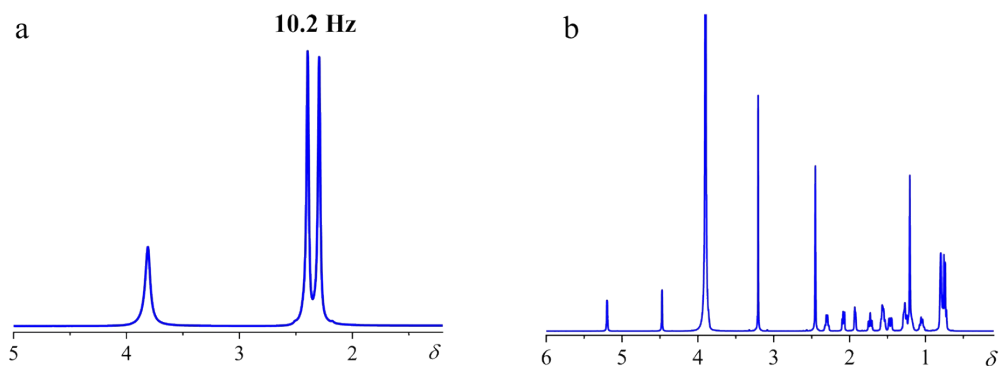

**Fig. S10.** (a) The quadrupolar DMSO-*d*<sub>6</sub> and D<sub>2</sub>O splittings after adding artemether and (b) <sup>1</sup>H spectra of artemether in the anisotropic sample of DMSO-*d*<sub>6</sub>/D<sub>2</sub>O bearing Ti<sub>3</sub>C<sub>2</sub>T<sub>x</sub> LC phase (2 wt%, DMSO-*d*<sub>6</sub> : D<sub>2</sub>O=4:1, at 305 K).

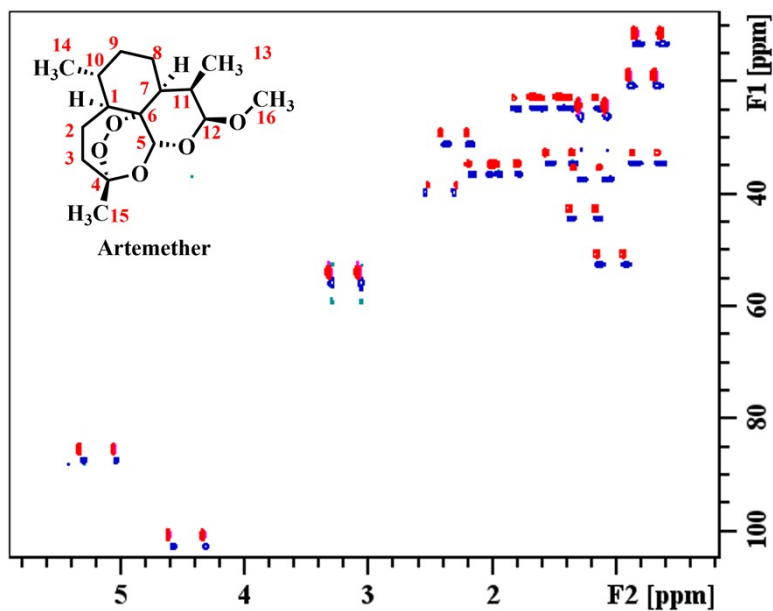

**Fig. S11.** Overlaid [<sup>1</sup>H, <sup>13</sup>C]-CLIP-HSQC spectra of artemether (5 mg) in the isotropic phase (DMSO-*d*<sub>6</sub>/D<sub>2</sub>O=4:1, red contours) and 2% alignment Ti<sub>3</sub>C<sub>2</sub>T<sub>x</sub> LC medium (anisotropic, blue contours) at 305 K.

**Table S3.** The scalar coupling value, compound coupling value, experimental RDCs and theoretical RDCs of artemether in DMSO- $d_6$ /D<sub>2</sub>O bearing Ti<sub>3</sub>C<sub>2</sub>T<sub>x</sub> LC phase (2 wt%, DMSO- $d_6$ /D<sub>2</sub>O=4:1) at 305 K.

| Atom number | $^1J_{\text{CH}}$ | $^1T_{\text{CH}}$ | $^1D_{\text{CH}}$ | $^1D_{\text{CH}}$ Calculation |
|-------------|-------------------|-------------------|-------------------|-------------------------------|
| C1H1        | 126.0±0.0         | 127.3±0.2         | 1.3±0.2           | 2.5                           |
| C3H3a       | 126.6±0.7         | 146.9±3.1         | 20.3±3.8          | 19.8                          |
| C3H3b       | 128.5±0.3         | 127.1±0.1         | -1.4±0.4          | -1.5                          |
| C5H5        | 168.0±0.2         | 158.7±0.5         | -9.3±0.7          | -8.6                          |
| C9H9a       | 128.1±0.7         | 117.5±0.3         | -10.6±1.0         | -10.5                         |
| C9H9b       | 123.3±0.4         | 127.5±0.5         | 4.2±0.9           | 2.6                           |
| C11H11      | 127.2±0.3         | 117.1±0.5         | -10.1±0.8         | -11.2                         |
| C12H12      | 165.0±0.3         | 157.4±0.1         | -7.6±0.4          | -8.0                          |
| C13H13(Me)  | 126.3±0.2         | 122.1±0.1         | -4.2±0.3          | -4.6                          |
| C14H14(Me)  | 125.1±0.2         | 127.3±0.1         | 2.2±0.3           | 2.9                           |
| C15H15(Me)  | 129.5±0.3         | 128.4±0.0         | -1.1±0.3          | -1.5                          |

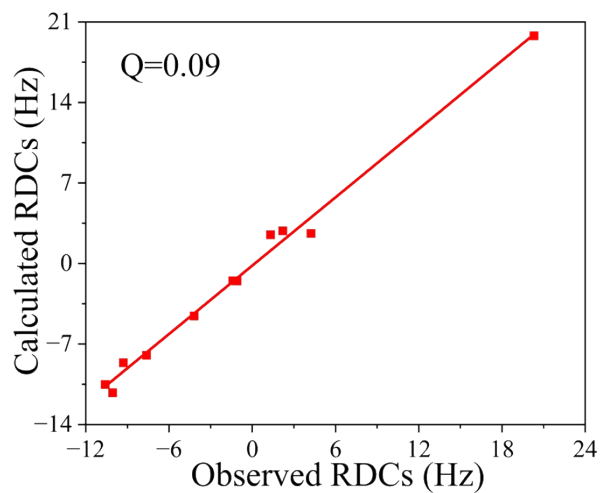

**Fig. S12.** Correlation between the experimental RDC values and calculated RDC values of artemether in the DMSO- $d_6$ /D $_2$ O bearing Ti $_3$ C $_2$ T $_x$  MXene LC (2 wt%, DMSO- $d_6$  : D $_2$ O=4:1) at 305 K.

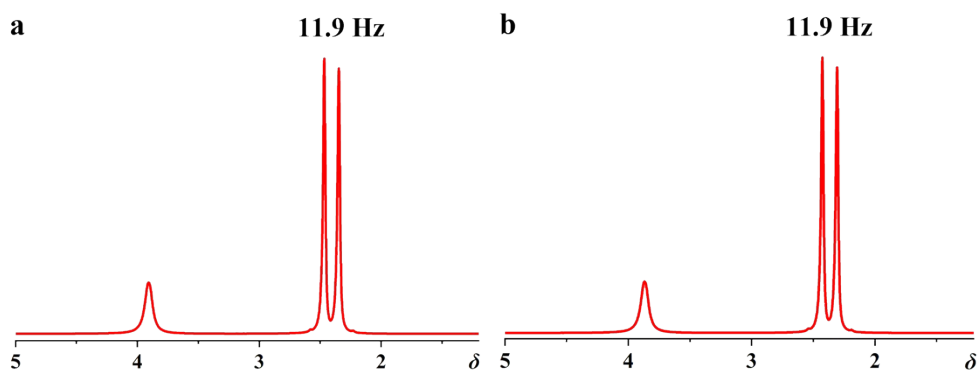

**Fig. S13.** The quadrupolar splitting of DMSO- $d_6$ /D $_2$ O before (a) and after (b) adding  $\alpha$ -santonin in the anisotropic sample (2 wt%, DMSO- $d_6$  : D $_2$ O=4:1).



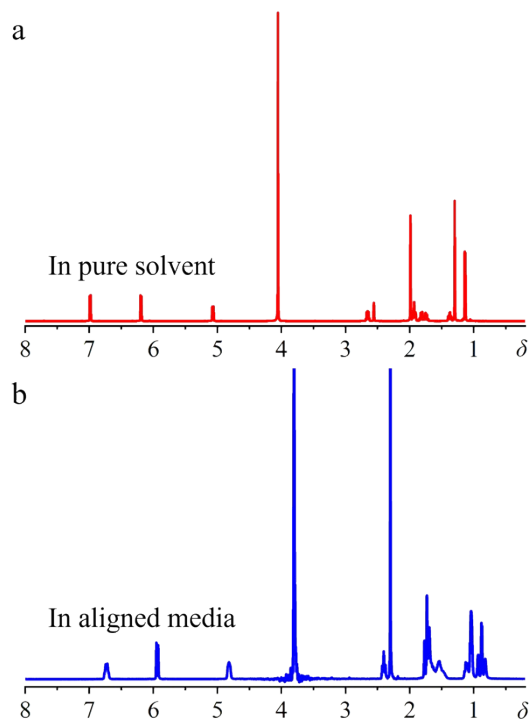

**Fig. S14.**  $^1\text{H}$  spectra of  $\alpha$ -santonin in (a) pure solvent (DMSO- $d_6$ /D $_2$ O=4:1) and (b) DMSO- $d_6$ /D $_2$ O bearing  $\text{Ti}_3\text{C}_2\text{T}_x$  LC medium (2 wt%, DMSO- $d_6$ /D $_2$ O=4:1).

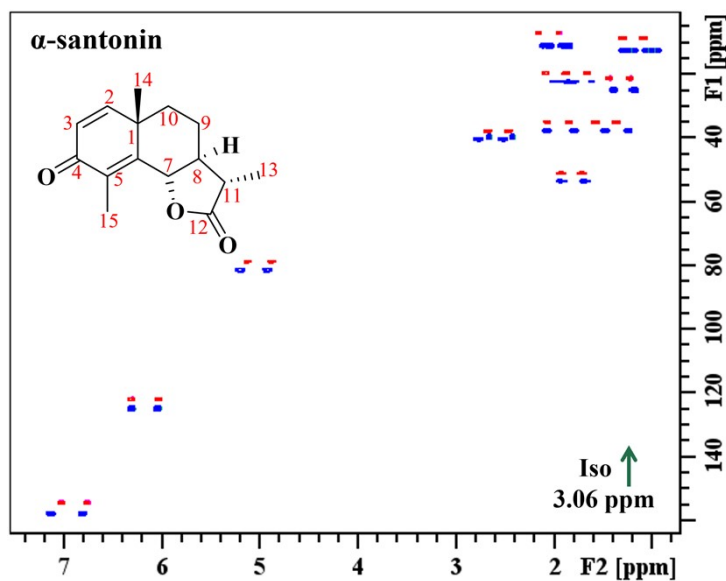

**Fig. S15.** Overlaid  $[^1\text{H}, ^{13}\text{C}]$ -CLIP-HSQC spectra of  $\alpha$ -santonin (5 mg) in the isotropic phase (DMSO- $d_6$ /D $_2$ O=4:1, red contours) and 2% alignment  $\text{Ti}_3\text{C}_2\text{T}_x$  LC medium (anisotropic, blue contours).

**Table S4.** The scalar coupling value, compound coupling value, experimental RDCs and theoretical RDCs of  $\alpha$ -santonin in DMSO- $d_6$ /D<sub>2</sub>O bearing Ti<sub>3</sub>C<sub>2</sub>T<sub>x</sub> LC phase (2 wt%, DMSO- $d_6$ /D<sub>2</sub>O=4:1).

| Atom number | $^1J_{\text{CH}}$ | $^1T_{\text{CH}}$ | $^1D_{\text{CH}}$ | $^1D_{\text{CH}}$ Calculation |
|-------------|-------------------|-------------------|-------------------|-------------------------------|
| C2H2        | 161.3±0.1         | 195.4±0.7         | 34.1±0.8          | 33.8                          |
| C3H3        | 165.3±0.2         | 158.7±0.4         | -6.6±0.6          | -6.7                          |
| C7H7        | 149.1±0.2         | 165.9±0.4         | 16.8±0.6          | 16.0                          |
| C8H8        | 130.1±0.2         | 150.4±2.5         | 20.3±2.7          | 23.1                          |
| C10H10a     | 131.9±0.1         | 165.4±0.6         | 33.5±0.8          | 32.4                          |
| C10H10b     | 129.3±0.4         | 145.2±1.2         | 15.9±1.6          | 16.3                          |
| C11H11      | 128.3±0.0         | 140.4±0.3         | 12.5±0.3          | 11.3                          |
| C13H13(Me)  | 128.2±0.0         | 143.1±0.5         | 14.8±0.5          | 15.2                          |
| C14H14(Me)  | 129.6±0.1         | 126.5±0           | -3.1±0.1          | -3.9                          |
| C15H15(Me)  | 129.4±0.6         | 120.0±0.2         | -9.4±0.8          | -8.2                          |

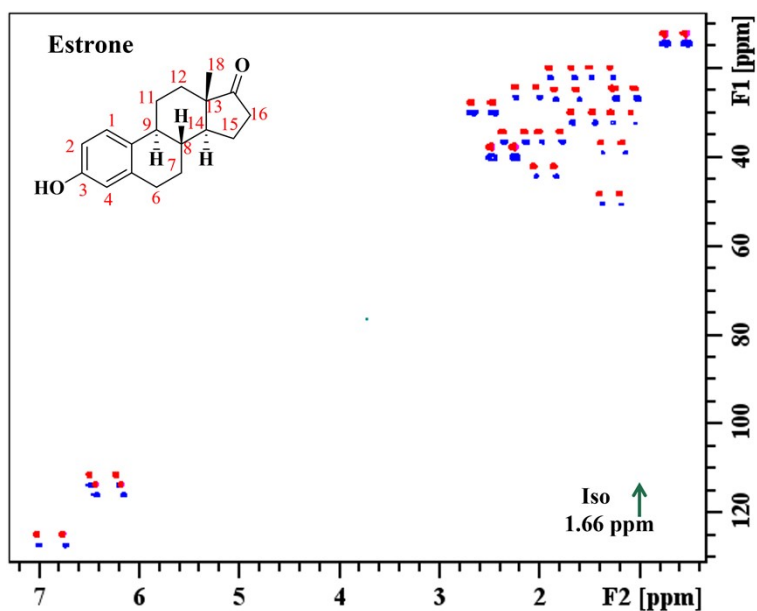

**Fig. S16.** Overlaid [ $^1\text{H}$ ,  $^{13}\text{C}$ ]-CLIP-HSQC spectra of estrone (2 mg) in the isotropic phase (red contours) and  $\text{DMSO-}d_6/\text{D}_2\text{O}$  bearing aligned  $\text{Ti}_3\text{C}_2\text{T}_x$  medium (2%, blue contours).

**Table S5.** The scalar coupling value, compound coupling value, experimental RDCs and theoretical RDCs of estrone in  $\text{DMSO-}d_6/\text{D}_2\text{O}$  bearing  $\text{Ti}_3\text{C}_2\text{T}_x$  LC phase (2 wt%,  $\text{DMSO-}d_6$ :  $\text{D}_2\text{O}=4:1$ )

| Atom number | $^1J_{\text{CH}}$ | $^1T_{\text{CH}}$ | $^1D_{\text{CH}}$ |
|-------------|-------------------|-------------------|-------------------|
| C1H1        | 154.1 $\pm$ 0.3   | 163.5 $\pm$ 0.4   | 9.4 $\pm$ 0.7     |
| C2H2        | 158.1 $\pm$ 0.0   | 169.5 $\pm$ 0.7   | 11.4 $\pm$ 0.7    |
| C4H4        | 154.2 $\pm$ 0.1   | 164.6 $\pm$ 0.4   | 10.4 $\pm$ 0.5    |
| C7H7a       | 128.2 $\pm$ 0.6   | 139.1 $\pm$ 0.3   | 10.9 $\pm$ 0.9    |
| C7H7b       | 124.5 $\pm$ 0.1   | 125.2 $\pm$ 0.1   | 0.7 $\pm$ 0.2     |
| C8H8        | 124.6 $\pm$ 0.0   | 124.8 $\pm$ 0.0   | 0.2 $\pm$ 0.0     |

|            |           |           |          |
|------------|-----------|-----------|----------|
| C9H9       | 122.8±0.2 | 124.7±0.2 | 1.9±0.4  |
| C11H11a    | 127.6±0.5 | 141.4±0.3 | 13.8±0.8 |
| C11H11b    | 126.0±0.1 | 123.7±0.0 | -2.3±0.1 |
| C12H12a    | 128.7±0.1 | 134.7±0.2 | 6.0±0.3  |
| C12H12b    | 126.5±0.0 | 125.9±0.0 | -0.6±0.0 |
| C14H14     | 115.0±0.3 | 116.1±0.2 | 1.1±0.5  |
| C15H15a    | 138.9±0.4 | 147.4±0.1 | 8.5±0.5  |
| C15H15b    | 117.3±0.2 | 126.2±0.1 | 8.9±0.3  |
| C16H16a    | 134.4±0.0 | 133.1±0.0 | -1.3±0.0 |
| C16H16b    | 125.6±0.7 | 125.1±0   | -0.5±0.7 |
| C18H18(Me) | 127.8±0.0 | 126.3±0.0 | -1.5±0.0 |

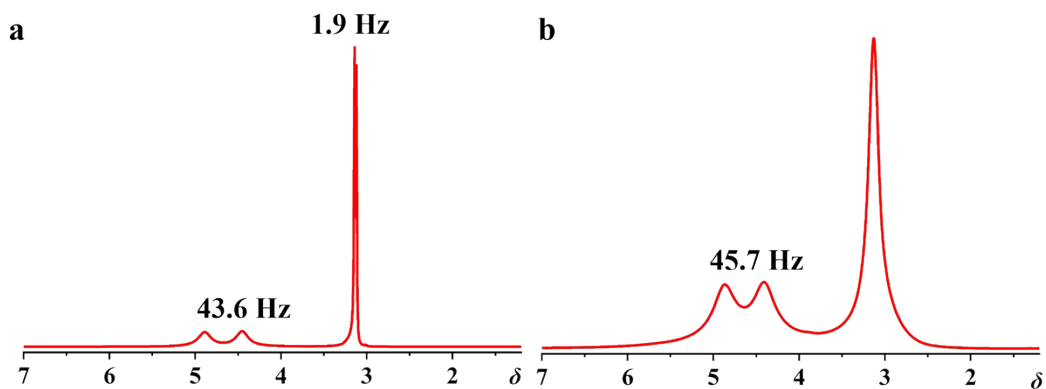

**Fig. S17.** The quadrupolar splittings of CD<sub>3</sub>OD/D<sub>2</sub>O before (a) and after (b) adding (+)-IPC in the anisotropic Ti<sub>3</sub>C<sub>2</sub>T<sub>x</sub> LC medium (2 wt%, CD<sub>3</sub>OD : D<sub>2</sub>O=4:1).

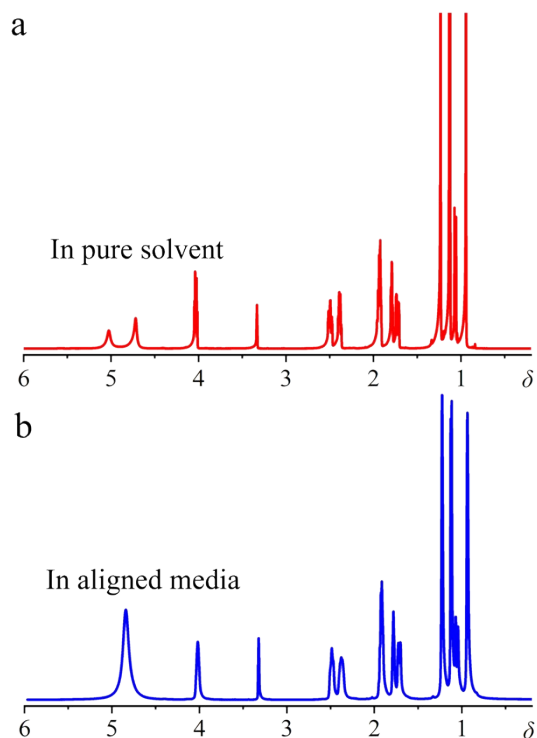

**Fig. S18.**  $^1\text{H}$  spectra of (+)-IPC in (a) pure solvent ( $\text{CD}_3\text{OD}/\text{D}_2\text{O}=4:1$ ) and (b)  $\text{CD}_3\text{OD}/\text{D}_2\text{O}$  bearing  $\text{Ti}_3\text{C}_2\text{T}_x$  LC medium (2 wt%,  $\text{CD}_3\text{OD} : \text{D}_2\text{O}=4:1$ ).

**Table S6.** The scalar coupling value, compound coupling value, experimental RDCs and theoretical RDCs of (+)-IPC in  $\text{CD}_3\text{OD}/\text{D}_2\text{O}$  bearing  $\text{Ti}_3\text{C}_2\text{T}_x$  LC phase (2 wt%,  $\text{CD}_3\text{OD} : \text{D}_2\text{O}=4:1$ ).

| Atom number | $^1J_{\text{CH}}$ | $^1T_{\text{CH}}$ | $1D_{\text{CH}}$ | $^1D_{\text{CH}}$ Calculation |
|-------------|-------------------|-------------------|------------------|-------------------------------|
| C1H1        | $140.4 \pm 0.2$   | $145.6 \pm 0.5$   | $5.2 \pm 0.7$    | 4.7                           |
| C2H2        | $126.9 \pm 0.2$   | $125.4 \pm 0.2$   | $-1.5 \pm 0.4$   | -1.5                          |
| C3H3        | $142.1 \pm 0.3$   | $143.4 \pm 0.0$   | $1.3 \pm 0.3$    | 0.9                           |
| C4H4a       | $126.8 \pm 0.2$   | $134.6 \pm 0.0$   | $7.8 \pm 0.2$    | 7.8                           |

|            |           |           |          |      |
|------------|-----------|-----------|----------|------|
| C4H4b      | 128.1±0.1 | 119.9±0.4 | -8.2±0.5 | -8.2 |
| C5H5       | 141.4±0.3 | 144.8±0.4 | 3.4±0.7  | 2.9  |
| C7H7a      | 135.4±0.2 | 136.6±0.1 | 1.2±0.3  | 0.9  |
| C7H7b      | 137.2±0.3 | 129.4±0.8 | -7.8±1.1 | -8.5 |
| C8H8(Me)   | 123.7±0.1 | 125.2±0.1 | 1.5±0.2  | 1.2  |
| C9H9(Me)   | 123.6±0.4 | 122.7±0.1 | -0.9±0.5 | -0.3 |
| C10H10(Me) | 125.1±0.0 | 125.3±0.0 | 0.2±0.0  | 0.5  |

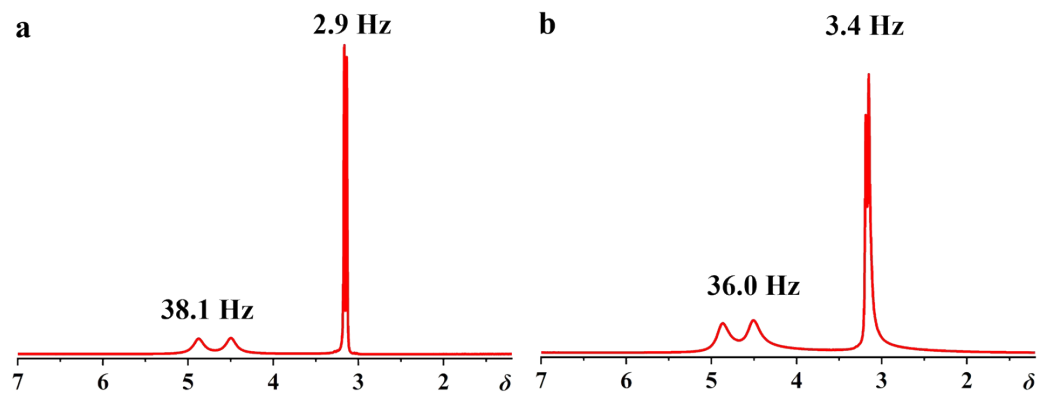

**Fig. S19.** The quadrupolar splittings of CD<sub>3</sub>OD/D<sub>2</sub>O before (a) and after (b) adding gibberellin in the anisotropic sample (2 wt%, CD<sub>3</sub>OD : D<sub>2</sub>O=4:1).

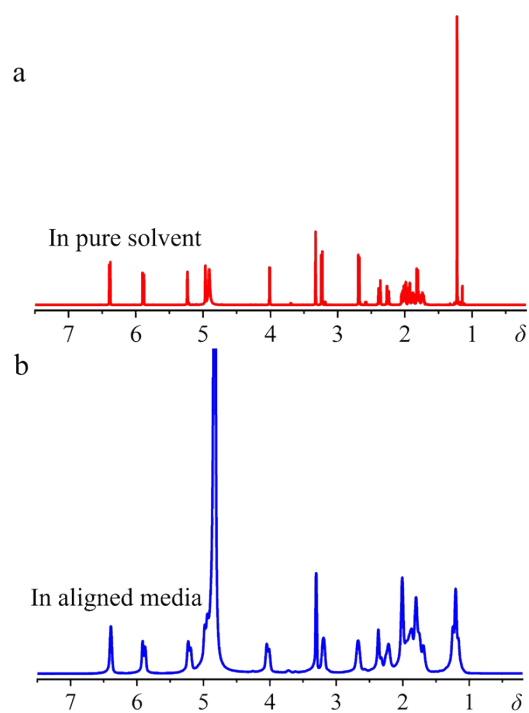

**Fig. S20.**  $^1\text{H}$  spectra of gibberellin in (a) pure solvent ( $\text{CD}_3\text{OD}/\text{D}_2\text{O}=4:1$ ) and (b)  $\text{CD}_3\text{OD}/\text{D}_2\text{O}$  bearing  $\text{Ti}_3\text{C}_2\text{T}_x$  LC medium (2 wt%,  $\text{CD}_3\text{OD} : \text{D}_2\text{O}=4:1$ ).

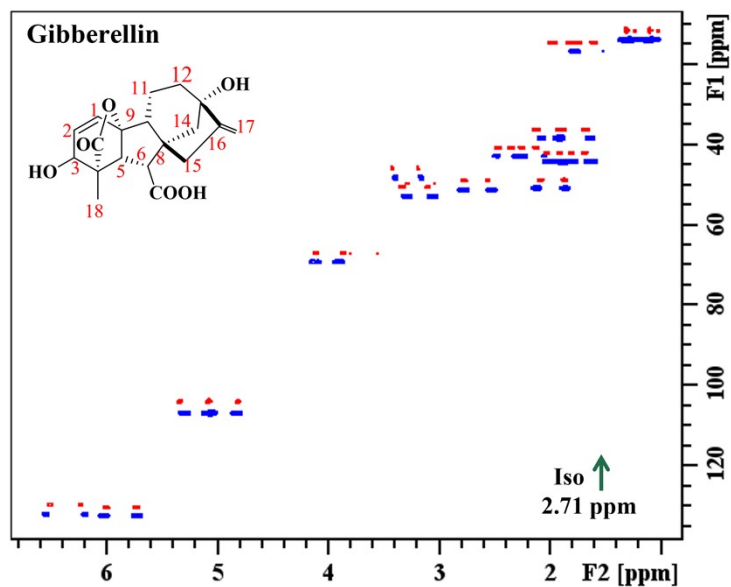

**Fig. S21.** Overlaid  $[^1\text{H}, ^{13}\text{C}]$ -CLIP-HSQC spectra of gibberellin (10 mg) in the isotropic phase (red contours) and  $\text{CD}_3\text{OD}/\text{D}_2\text{O}$  bearing  $\text{Ti}_3\text{C}_2\text{T}_x$  medium (2 wt%,  $\text{CD}_3\text{OD} : \text{D}_2\text{O}=4:1$ , blue contours).

**Table S7.** The scalar coupling value, compound coupling value, experimental RDCs and theoretical RDCs of gibberellin in CD<sub>3</sub>OD/D<sub>2</sub>O bearing Ti<sub>3</sub>C<sub>2</sub>T<sub>x</sub> LC phase (2 wt%; CD<sub>3</sub>OD : D<sub>2</sub>O=4:1).

| Atom number | $^1J_{\text{CH}}$ | $^1T_{\text{CH}}$ | $^1D_{\text{CH}}$ | $^1D_{\text{CH}}$ Calculation |
|-------------|-------------------|-------------------|-------------------|-------------------------------|
| C1H1        | 166.4±0.1         | 200.1±1.3         | 33.7±1.4          | 32.3                          |
| C3H3        | 147.1±0.2         | 127.2±0.8         | -19.9±1.0         | -18.4                         |
| C5H5        | 142.3±0.0         | 134.9±0.0         | -7.4±0.0          | -7.4                          |
| C6H6        | 129.8±0.1         | 151.4±0.6         | 21.6±0.7          | 22.6                          |
| C9H9        | 127.6±1.3         | 151.6±1.5         | 24.0±2.8          | 23.0                          |
| C12H12b     | 127.4±1.4         | 106.4±1.1         | -21.0±2.5         | -17.8                         |
| C12H12b     | 137.3±0.2         | 156.3±2.3         | 29.0±2.5          | 32.2                          |
| C17H17a     | 158.7±0.2         | 142.1±2.3         | -16.6±2.5         | -17.8                         |
| C17H17b     | 158.8±0.0         | 153.3±1.5         | -5.5±1.5          | -6.1                          |
| C18H18(Me)  | 128.2±0.0         | 117.9±0.9         | -10.3±0.9         | -11.0                         |



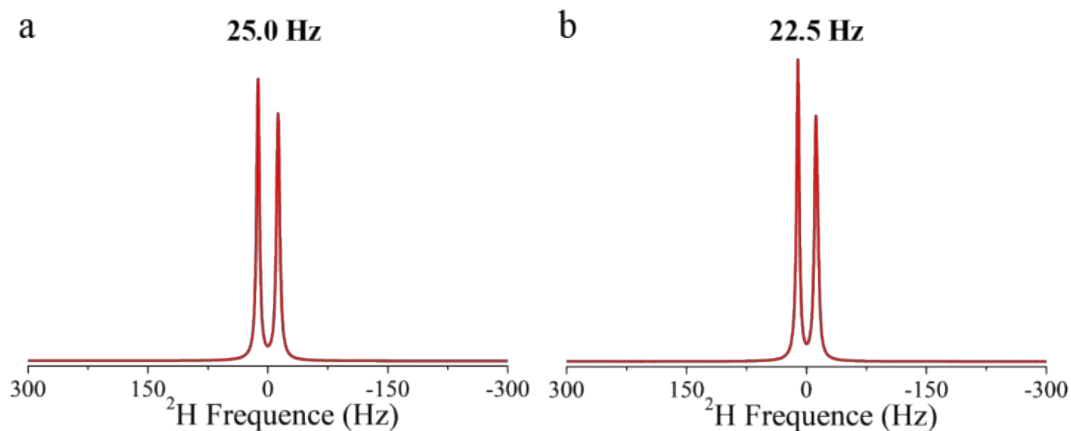

**Fig. S22.** A quadrupolar  $D_2O$  splitting before (a) and after (b) adding L-proline in the anisotropic sample (2 wt% MXene  $Ti_3C_2T_x$  LC phase).

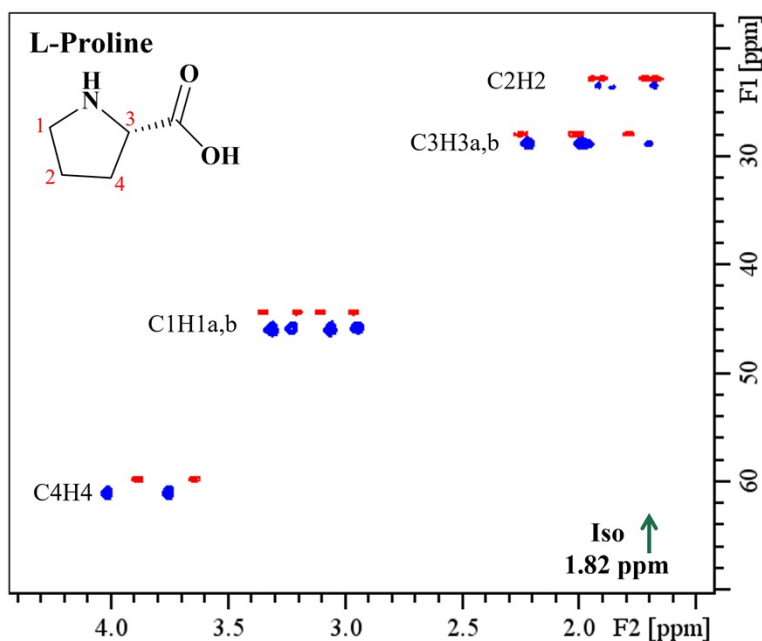

**Fig. S23.** Overlaid  $[^1H, ^{13}C]$ -CLIP-HSQC spectra of L-proline (5 mg) in the isotropic phase (red contours) and  $D_2O$ -bearing  $Ti_3C_2T_x$  LC medium (2 wt%  $Ti_3C_2T_x$ , blue contours).

**Table S8.** The scalar coupling value, compound coupling value, experimental RDCs and theoretical RDCs of L-proline in  $D_2O$  bearing  $Ti_3C_2T_x$  LC phase (2 wt%).

| Atom number | $^1J_{\text{CH}}$ | $^1T_{\text{CH}}$ | $^1D_{\text{CH}}$ | $^1D_{\text{CH}}$ Calculation |
|-------------|-------------------|-------------------|-------------------|-------------------------------|
| C1H1a       | 146.8±0.1         | 150.7±0.5         | 3.9±0.6           | 3.5                           |
| C1H1b       | 147.4±0.0         | 169.9±0.7         | 22.5±0.7          | 22.9                          |
| C2H2a       | 135.2±0.1         | 144.0±0.2         | 8.8±0.3           | 8.4                           |
| C3H3a       | 137.3±0.2         | 135.5±0.5         | -1.8±0.7          | -2.4                          |
| C3H3b       | 135.5±1.1         | 173.4±0.4         | 37.9±1.5          | 37.8                          |
| C4H4        | 148.4±0.1         | 157.8±0.3         | 9.4±0.4           | 9.1                           |

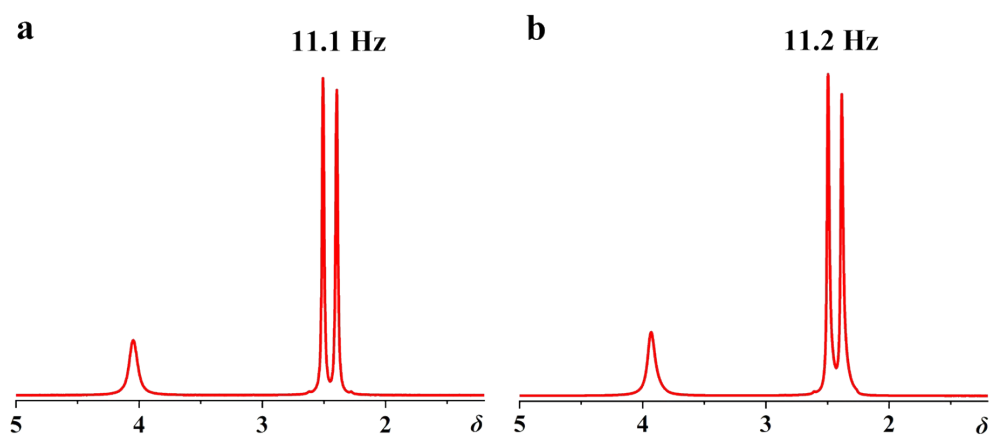

**Fig. S24.** The quadrupolar splittings of DMSO- $d_6$ /D $_2$ O before (a) and after (b) adding L-proline in the anisotropic sample (2 wt% MXene Ti $_3$ C $_2$ T $_x$  LC phase, DMSO- $d_6$ : D $_2$ O=4:1).

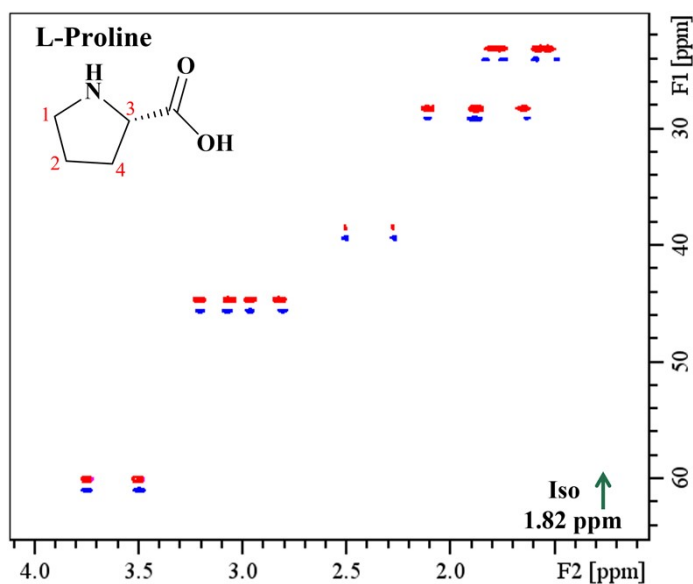

**Fig. S25.** Overlaid  $[^1\text{H}, ^{13}\text{C}]$ -CLIP-HSQC spectra of L-proline (5 mg) in the isotropic phase (DMSO- $d_6$ /D $_2$ O=4 : 1, red contours) and DMSO- $d_6$ /D $_2$ O bearing  $\text{Ti}_3\text{C}_2\text{T}_x$  medium (2%, DMSO- $d_6$ /D $_2$ O=4 : 1, blue contours).

**Table S9.** The scalar coupling value, compound coupling value, experimental RDCs and theoretical RDCs of L-proline in DMSO- $d_6$ /D $_2$ O bearing  $\text{Ti}_3\text{C}_2\text{T}_x$  LC phase (2 wt%, DMSO- $d_6$  : D $_2$ O=4:1).

| Atom number | $^1J_{\text{CH}}$ | $^1T_{\text{CH}}$ | $^1D_{\text{CH}}$ | $^1D_{\text{CH}}$ Calculation |
|-------------|-------------------|-------------------|-------------------|-------------------------------|
| C1H1a       | 146.6±0.3         | 144.2±0.3         | -2.4±0.6          | -1.8                          |
| C1H1b       | 145.8±0.1         | 160.7±0.4         | 14.9±0.5          | 14.3                          |
| C2H2a       | 134.1±0.7         | 147.9±0.5         | 13.8±1.2          | 14.4                          |
| C3H3a       | 141.6±0.2         | 138.1±0.2         | -3.4±0.4          | -2.7                          |
| C3H3b       | 133.6±0.0         | 147.4±0.3         | 13.8±0.3          | 13.9                          |
| C4H4        | 146.5±0.0         | 151.2±0.3         | 4.7±0.3           | 5.0                           |

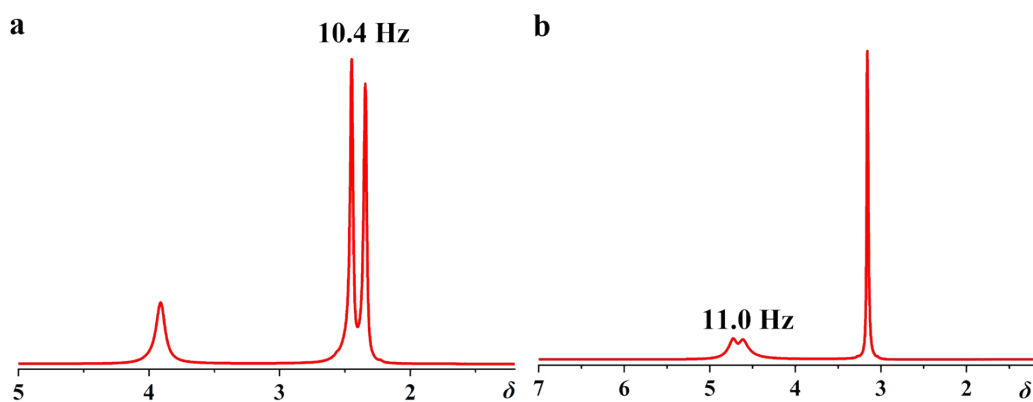

**Fig. S26.** The  $^2\text{H}$  NMR spectra of  $\text{Ti}_3\text{C}_2\text{T}_x$  media in the  $\text{DMSO-}d_6/\text{D}_2\text{O}$  (a) and  $\text{CD}_3\text{OD}/\text{D}_2\text{O}$  with adding Boc-D-tryptophan in the anisotropic sample (2 wt% MXene  $\text{Ti}_3\text{C}_2\text{T}_x$  LC phase,  $\text{DMSO-}d_6$  :  $\text{D}_2\text{O}=4:1$ )

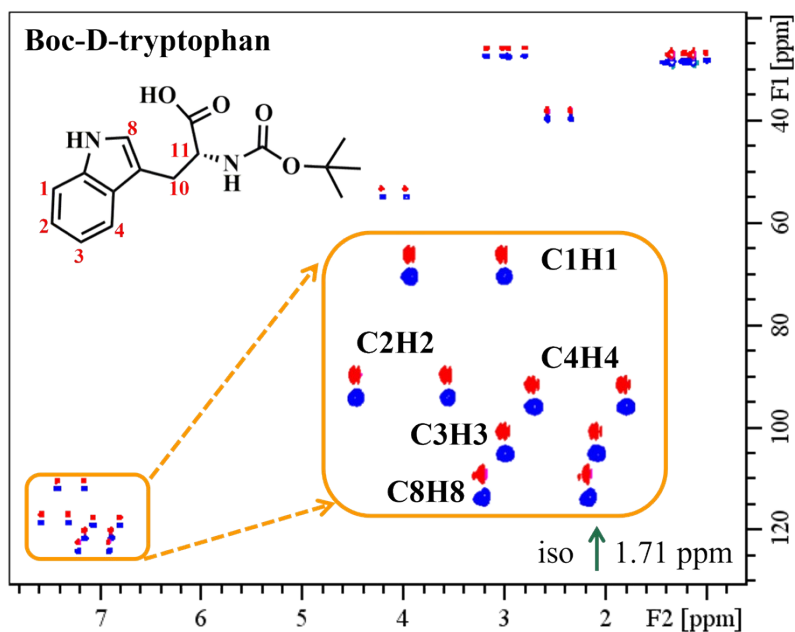

**Fig. S27.** Overlaid  $[^1\text{H}, ^{13}\text{C}]$ -CLIP-HSQC spectra of Boc-D-tryptophan (5 mg) in the isotropic phase (red contours) and  $\text{DMSO-}d_6/\text{D}_2\text{O}$  bearing  $\text{Ti}_3\text{C}_2\text{T}_x$  medium (2 wt%, blue contours).

**Table S10.** The scalar coupling value, compound coupling value, experimental RDCs and theoretical RDCs of Boc-D-tryptophan in DMSO- $d_6$ /D<sub>2</sub>O bearing Ti<sub>3</sub>C<sub>2</sub>T<sub>x</sub> LC phase (2 wt%, DMSO- $d_6$ : D<sub>2</sub>O=4:1).

| Atom number | $^1J_{CH}$ | $^1T_{CH}$ | $^1D_{CH}$ | $^1D_{CH}$ Calculation |
|-------------|------------|------------|------------|------------------------|
| C1H1        | 159.2±0.3  | 160.4±0.5  | 1.2±0.8    | 1.0                    |
| C2H2        | 157.4±0.0  | 158.2±0.2  | 0.8±0.2    | 0.8                    |
| C3H3        | 158.8±0.0  | 156.0±0.1  | 1.2±0.1    | 1.4                    |
| C4H4        | 158.7±0.0  | 158.4±0.0  | -0.3±0.0   | -0.3                   |
| C8H8        | 180.7±0.0  | 181.9±0.1  | 1.2±0.1    | 1.0                    |
| C10H10a     | 128.3±0.1  | 126.7±0.0  | -1.6±0.1   | -1.5                   |
| C10H10b     | 129.9±0.0  | 125.3±0.5  | -4.6±0.5   | -4.6                   |
| C11H11      | 141.2±0.1  | 138.6±0.2  | -2.6±0.3   | -2.8                   |

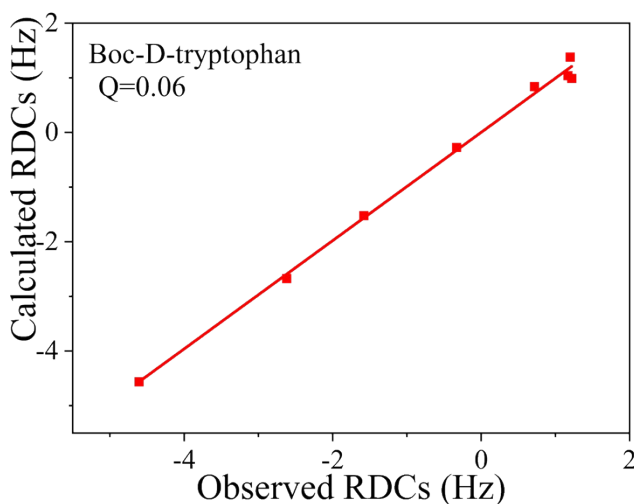

**Fig. S28.** Correlation between the experimental and calculated RDC values of Boc-D-tryptophan in the DMSO- $d_6$ /D<sub>2</sub>O bearing Ti<sub>3</sub>C<sub>2</sub>T<sub>x</sub> LC phase (2 wt%, DMSO- $d_6$ : D<sub>2</sub>O=4:1).

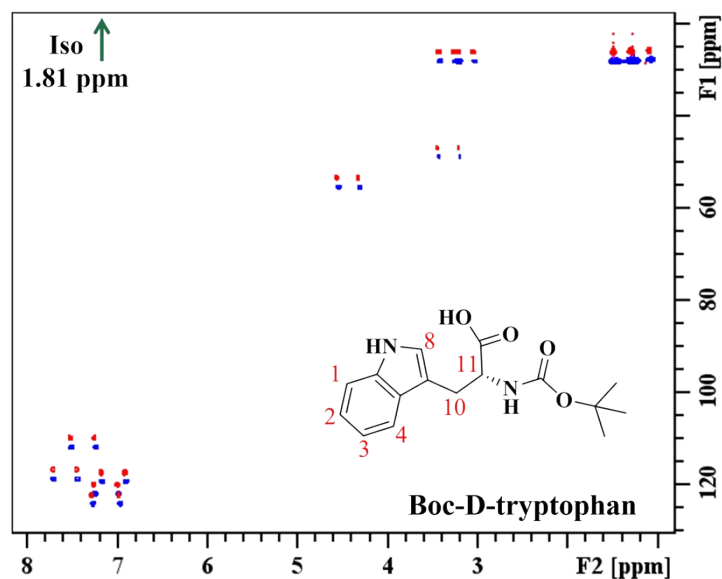

**Fig. S29.** Overlaid [ $^1\text{H}$ ,  $^{13}\text{C}$ ]-CLIP-HSQC spectra of Boc-D-tryptophan (5 mg) in the isotropic phase (red contours) and  $\text{CD}_3\text{OD}/\text{D}_2\text{O}$  bearing  $\text{Ti}_3\text{C}_2\text{T}_x$  medium (2%,  $\text{CD}_3\text{OD} : \text{D}_2\text{O}=4:1$ , blue contours).

**Table S11.** The scalar coupling value, compound coupling value, experimental RDCs and theoretical RDCs of Boc-D-tryptophan in  $\text{CD}_3\text{OD}/\text{D}_2\text{O}$  bearing  $\text{Ti}_3\text{C}_2\text{T}_x$  LC phase (2 wt%,  $\text{CD}_3\text{OD} : \text{D}_2\text{O}=4:1$ ).

| Atom number | $^1J_{\text{CH}}$ | $^1T_{\text{CH}}$ | $^1D_{\text{CH}}$ | $^1D_{\text{CH}}$ Calculation |
|-------------|-------------------|-------------------|-------------------|-------------------------------|
| C1H1        | 159.2±0.3         | 160.3±0.4         | 1.1±0.7           | 1.4                           |
| C2H2        | 157.5±0.0         | 161.8±0.0         | 4.3±0.0           | 4.2                           |
| C3H3        | 158.6±0.1         | 160.4±0.1         | 1.8±0.2           | 1.8                           |
| C4H4        | 158.5±0.0         | 159.7±0.1         | 1.3±0.1           | 1.0                           |
| C8H8        | 180.4±0.0         | 182.2±0.1         | 1.8±0.1           | 1.9                           |
| C10H10a     | 129.6±0.0         | 126.4±0.1         | -3.2±0.1          | -3.0                          |

|         |           |           |          |      |
|---------|-----------|-----------|----------|------|
| C10H10b | 129.2±0.0 | 125.0±0.2 | -4.1±0.2 | -4.2 |
| C11H11  | 142.4±0.3 | 140.9±0.2 | -1.5±0.5 | -1.9 |

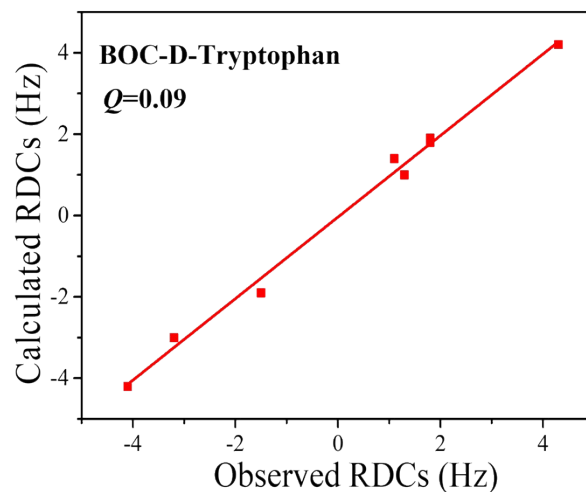

**Fig. S30.** Correlation between the experimental and calculated RDC values of Boc-D-tryptophan in the CD<sub>3</sub>OD/D<sub>2</sub>O bearing Ti<sub>3</sub>C<sub>2</sub>T<sub>x</sub> medium (2%, CD<sub>3</sub>OD : D<sub>2</sub>O=4:1).

## References

- 1 G. Kummerlöwe, S. Schmitt and B. Luy, *Open Spectrosc. J.*, 2010, **4**, 16–27.
- 2 P. Trigo-Mouriño, A. Navarro-Vázquez, J. Ying, R. R. Gil and A. Bax, *Angew. Chemie Int. Ed.*, 2011, **50**, 7576–7580.
- 3 J. A. Losonczi, M. Andrec, M. W. F. Fischer and J. H. Prestegard, *J. Magn. Reson.*, 1999, **138**, 334–342.
- 4 Y. Liu, A. Navarro-Vázquez, R. R. Gil, C. Griesinger, G. E. Martin and R. T. Williamson, *Nat. Protoc.*, 2019, **14**, 217–247.

## MSpin output Data

Calculated Corresponding alignment tensor for L-camphor in  $\text{Ti}_3\text{C}_2\text{T}_x$  MXene with  $\text{DMSO-}d_6/\text{D}_2\text{O}$ .

Cornilescu Quality factor: 0.0738825

Alignment tensor information:

$A'_x = 6.870\text{e-}05$

$A'_y = 1.546\text{e-}04$

$A'_z = -2.233\text{e-}04$

Saupe tensor

$S'_x = 1.031\text{e-}04$

$S'_y = 2.319\text{e-}04$

$S'_z = -3.350\text{e-}04$

Alignment tensor eigenvectors

$e[x] = (0.982, -0.169, 0.080)$

$e[y] = (0.182, 0.776, -0.603)$

$e[z] = (0.040, 0.607, 0.793)$

Alignment tensor in laboratory coordinates:

[ 7.109e-05, 5.060e-06, -1.874e-05]

[ 5.060e-06, 1.276e-05, -1.810e-04]

[-1.874e-05, -1.810e-04, -8.385e-05]

SVD condition number is 2.426e+00

Axial component  $A_a = -3.350\text{e-}04$

Rhombic component  $A_r = -8.591\text{e-}05$

Field=11.74 Teslas [ 3.63]

rhombicity  $R = 0.256$

Asimmetry parameter  $\text{etha} = 3.847\text{e-}01$



GDO = 4.009e-04

ZY'Z" Euler Angles (degrees)

Set 1

(86.2,37.5,-97.5)

Set 2

(-93.8,-37.5,82.5)

Calculated Corresponding alignment tensor for artemether in  $Ti_3C_2T_x$  MXene with DMSO- $d_6/D_2O$ .

Cornilescu Quality factor: 0.0544837

Alignment tensor information:

A'x= 1.442e-04

A'y= 1.824e-04

A'z=-3.266e-04

Saupe tensor

S'x= 2.163e-04

S'y= 2.736e-04

S'z=-4.899e-04

Alignment tensor eigenvectors

e[x]=(-0.575, 0.815, 0.078)

e[y]=( 0.619, 0.371, 0.692)

e[z]=( 0.535, 0.446,-0.718)

Alignment tensor in laboratory coordinates:

[ 2.411e-05,-1.035e-04,1.971e-04]

[-1.035e-04,5.588e-05,1.604e-04]

[ 1.971e-04,1.604e-04,-7.999e-05]

SVD condition number is  $6.542e+00$

Axial component  $A_a = -4.899e-04$

Rhombic component  $A_r = -3.819e-05$

Field= $11.74$  Teslas[  $3.63$ ]

rhombicity  $R = 0.078$

Asimmetry parameter  $\eta = 1.169e-01$

GDO =  $5.676e-04$

ZY'Z'' Euler Angles (degrees)

Set 1

( $39.8, 135.9, 96.4$ )

Set 2

( $-140.2, -135.9, -83.6$ )

Calculated Corresponding alignment tensor for artemether in  $Ti_3C_2T_x$  MXene with  $DMSO-d_6/D_2O$  at  $305$  K.

Cornilescu Quality factor:  $0.0915959$

Alignment tensor information:

$A'_x = 1.239e-04$

$A'_y = 2.300e-04$

$A'_z = -3.540e-04$

Saupe tensor

$S'_x = 1.859e-04$

$S'_y = 3.451e-04$

$S'_z = -5.310e-04$

Alignment tensor eigenvectors

$e[x] = (-0.099, 0.942, 0.322)$

$e[y] = (0.810, -0.112, 0.576)$

$e[z]=(0.578, 0.318, -0.751)$

Alignment tensor in laboratory coordinates:

[ 3.384e-05,-9.743e-05,2.571e-04]

[-9.743e-05,7.694e-05,1.074e-04]

[ 2.571e-04,1.074e-04,-1.108e-04]

SVD condition number is 6.542e+00

Axial component  $A_a = -5.310e-04$

Rhombic component  $A_r = -1.061e-04$

Field=11.74 Teslas[ 3.63]

rhombicity  $R = 0.200$

Asimmetry parameter  $\eta = 2.998e-01$

GDO = 6.267e-04

ZY'Z" Euler Angles (degrees)

Set 1

(28.8,138.7,119.2)

Set 2

(-151.2,-138.7,-60.8)

Calculated Corresponding alignment tensor for  $\alpha$ -santonin in  $Ti_3C_2T_x$  MXene with DMSO- $d_6$ /D<sub>2</sub>O.

Output files of MSpin for the RDCs analysis of SSSS for  $\alpha$ -santonine:

Cornilescu Quality factor: 0.0598082

Alignment tensor information:

$A'_x = 1.533e-04$

$A'_y = 1.123e-03$

$A'_z = -1.276e-03$

Saupe tensor

$$S'_x = 2.299e-04$$

$$S'_y = 1.684e-03$$

$$S'_z = -1.914e-03$$

Alignment tensor eigenvectors

$$e[x] = (0.100, -0.813, 0.574)$$

$$e[y] = (0.911, 0.307, 0.275)$$

$$e[z] = (-0.400, 0.495, 0.771)$$

Alignment tensor in laboratory coordinates:

$$[ 7.294e-04, 5.540e-04, 6.844e-04]$$

$$[ 5.540e-04, -1.056e-04, -4.638e-04]$$

$$[ 6.844e-04, -4.638e-04, -6.238e-04]$$

SVD condition number is 9.006e+00

$$\text{Axial component } A_a = -1.914e-03$$

$$\text{Rhombic component } A_r = -9.696e-04$$

$$\text{Field} = 11.74 \text{ Teslas} [3.63]$$

$$\text{rhombicity } R = 0.507$$

$$\text{Asimmetry parameter } \text{etha} = 7.598e-01$$

$$\text{GDO} = 2.509e-03$$

ZY'Z'' Euler Angles (degrees)

Set 1

$$(128.9, 39.5, 154.3)$$

Set 2

$$(-51.1, -39.5, -25.7)$$

Output files of MSpin for the RDCs analysis of SRRR for  $\alpha$ -santonine:

Cornilescu Quality factor: 0.20601

Alignment tensor information:

A'x= 2.338e-04

A'y= 1.155e-03

A'z=-1.389e-03

Saupe tensor

S'x= 3.508e-04

S'y= 1.733e-03

S'z=-2.084e-03

Alignment tensor eigenvectors

e[x]=( 0.117,-0.744, 0.658)

e[y]=( 0.861, 0.406, 0.306)

e[z]=(-0.494, 0.531, 0.688)

Alignment tensor in laboratory coordinates:

[ 5.209e-04,7.482e-04,7.947e-04]

[ 7.482e-04,-7.281e-05,-4.790e-04]

[ 7.947e-04,-4.790e-04,-4.481e-04]

SVD condition number is 8.634e+00

Axial component Aa = -2.084e-03

Rhombic component Ar = -9.214e-04

Field=11.74 Teslas[ 3.63]

rhombicity R = 0.442

Asimmetry parameter etha =6.633e-01

GDO = 2.658e-03

ZY'Z" Euler Angles (degrees)

Set 1

(132.9,46.5,155.1)

Set 2

(-47.1,-46.5,-24.9)

Output files of MSpin for the RDCs analysis of SRSR for  $\alpha$ -santonine:

Cornilescu Quality factor: 0.165632

Alignment tensor information:

A'x=-1.649e-04

A'y=-8.933e-04

A'z= 1.058e-03

Saupe tensor

S'x=-2.473e-04

S'y=-1.340e-03

S'z= 1.587e-03

Alignment tensor eigenvectors

e[x]=( 0.231, 0.759, 0.608)

e[y]=( 0.498,-0.629, 0.596)

e[z]=( 0.836, 0.165,-0.524)

Alignment tensor in laboratory coordinates:

[ 5.080e-04,3.973e-04,-7.521e-04]

[ 3.973e-04,-4.200e-04,1.675e-04]

[-7.521e-04,1.675e-04,-8.800e-05]

SVD condition number is 6.838e+00

Axial component Aa = 1.587e-03

Rhombic component  $A_r = 7.285e-04$

Field=11.74 Teslas[ 3.63]

rhombicity  $R = 0.459$

Asimmetry parameter  $\eta = 6.884e-01$

GDO =  $2.038e-03$

ZY'Z" Euler Angles (degrees)

Set 1

(11.2,121.6,135.6)

Set 2

(-168.8,-121.6,-44.4)

Output files of MSpin for the RDCs analysis of SSRR for  $\alpha$ -santonine:

Cornilescu Quality factor: 0.295325

Alignment tensor information:

$A'_x = -1.263e-04$

$A'_y = -8.455e-04$

$A'_z = 9.717e-04$

Saupe tensor

$S'_x = -1.894e-04$

$S'_y = -1.268e-03$

$S'_z = 1.458e-03$

Alignment tensor eigenvectors

$e[x] = (-0.419, 0.547, 0.725)$

$e[y] = (-0.128, -0.826, 0.549)$

$e[z] = (0.899, 0.137, 0.416)$

Alignment tensor in laboratory coordinates:

[ 7.495e-04,5.875e-05,4.612e-04]

[ 5.875e-05,-5.966e-04,3.885e-04]

[ 4.612e-04,3.885e-04,-1.529e-04]

SVD condition number is 6.851e+00

Axial component  $A_a = 1.458e-03$

Rhombic component  $A_r = 7.192e-04$

Field=11.74 Teslas[ 3.63]

rhombicity  $R = 0.493$

Asimmetry parameter  $\eta = 7.402e-01$

GDO = 1.900e-03

ZY'Z" Euler Angles (degrees)

Set 1

(8.6,65.4,142.9)

Set 2

(-171.4,-65.4,-37.1)

Output files of MSpin for the RDCs analysis of SRRS for  $\alpha$ -santonine:

Cornilescu Quality factor: 0.203519

Alignment tensor information:

$A'_x = 2.267e-04$

$A'_y = 1.167e-03$

$A'_z = -1.394e-03$

Saupe tensor

$S'_x = 3.400e-04$

$S'_y = 1.750e-03$

$S'_z = -2.090e-03$



Alignment tensor eigenvectors

$e[x] = (0.144, -0.765, 0.628)$

$e[y] = (0.880, 0.389, 0.272)$

$e[z] = (-0.453, 0.513, 0.729)$

Alignment tensor in laboratory coordinates:

$[6.227e-04, 6.985e-04, 7.600e-04]$

$[6.985e-04, -5.776e-05, -5.068e-04]$

$[7.600e-04, -5.068e-04, -5.650e-04]$

SVD condition number is  $8.038e+00$

Axial component  $A_a = -2.090e-03$

Rhombic component  $A_r = -9.402e-04$

Field = 11.74 Teslas [ 3.63]

rhombicity  $R = 0.450$

Asimmetry parameter  $\eta = 6.747e-01$

GDO =  $2.674e-03$

ZY'Z'' Euler Angles (degrees)

Set 1

(131.4, 43.2, 156.6)

Set 2

(-48.6, -43.2, -23.4)

Output files of MSpin for the RDCs analysis of SSRS for  $\alpha$ -santonine:

Cornilescu Quality factor: 0.251565

Alignment tensor information:

$A'_x = -2.705e-04$

$$A'y = -5.167e-04$$

$$A'z = 7.872e-04$$

Saupe tensor

$$S'x = -4.058e-04$$

$$S'y = -7.750e-04$$

$$S'z = 1.181e-03$$

Alignment tensor eigenvectors

$$e[x] = (0.093, 0.425, -0.900)$$

$$e[y] = (-0.454, 0.823, 0.342)$$

$$e[z] = (0.886, 0.377, 0.270)$$

Alignment tensor in laboratory coordinates:

$$[5.092e-04, 4.453e-04, 2.910e-04]$$

$$[4.453e-04, -2.869e-04, 3.837e-05]$$

$$[2.910e-04, 3.837e-05, -2.223e-04]$$

SVD condition number is  $6.104e+00$

Axial component  $A_a = 1.181e-03$

Rhombic component  $A_r = 2.461e-04$

Field = 11.74 Teslas [3.63]

rhombicity  $R = 0.208$

Asimmetry parameter  $\eta = 3.127e-01$

GDO =  $1.396e-03$

ZY'Z" Euler Angles (degrees)

Set 1

(23.0, 74.4, 20.8)

Set 2

(-157.0,-74.4,-159.2)

Output files of MSpin for the RDCs analysis of SSSR for  $\alpha$ -santonine:

Cornilescu Quality factor: 0.144216

Alignment tensor information:

A'x=-1.948e-04

A'y=-1.271e-03

A'z= 1.466e-03

Saupe tensor

S'x=-2.923e-04

S'y=-1.907e-03

S'z= 2.199e-03

Alignment tensor eigenvectors

e[x]=(-0.453, 0.620,-0.641)

e[y]=(-0.450, 0.461, 0.764)

e[z]=( 0.770, 0.635, 0.070)

Alignment tensor in laboratory coordinates:

[ 5.707e-04,1.035e-03,4.605e-04]

[ 1.035e-03,2.449e-04,-3.053e-04]

[ 4.605e-04,-3.053e-04,-8.156e-04]

SVD condition number is 7.165e+00

Axial component Aa = 2.199e-03

Rhombic component Ar = 1.076e-03

Field=11.74 Teslas[ 3.63]

rhombicity R = 0.489

Asimmetry parameter etha =7.342e-01

GDO = 2.861e-03

ZY'Z" Euler Angles (degrees)

Set 1

(39.5,86.0,50.0)

Set 2

(-140.5,-86.0,-130.0)

Output files of MSpin for the RDCs analysis of SRSS for  $\alpha$ -santonine:

Cornilescu Quality factor: 0.29817

Alignment tensor information:

A'x=-4.111e-04

A'y=-8.645e-04

A'z= 1.276e-03

Saupe tensor

S'x=-6.167e-04

S'y=-1.297e-03

S'z= 1.913e-03

Alignment tensor eigenvectors

e[x]=( 0.104, 0.993,-0.052)

e[y]=(-0.662, 0.108, 0.742)

e[z]=( 0.742,-0.043, 0.669)

Alignment tensor in laboratory coordinates:

[ 3.201e-04,-2.169e-05,1.060e-03]

[-2.169e-05,-4.133e-04,-8.508e-05]

[ 1.060e-03,-8.508e-05,9.323e-05]

SVD condition number is  $5.131e+00$

Axial component  $A_a = 1.913e-03$

Rhombic component  $A_r = 4.534e-04$

Field=11.74 Teslas[ 3.63]

rhombicity  $R = 0.237$

Asimmetry parameter  $\eta = 3.554e-01$

GDO =  $2.278e-03$

ZY'Z'' Euler Angles (degrees)

Set 1

(-3.3,48.0,86.0)

Set 2

(176.7,-48.0,-94.0)

Calculated Corresponding alignment tensor for (+)-IPC in  $Ti_3C_2T_x$  MXene with  $CD_3OD/D_2O$ .

Cornilescu Quality factor: 0.0823784

Alignment tensor information:

$A'_x = -1.899e-06$

$A'_y = -1.375e-04$

$A'_z = 1.394e-04$

Saupe tensor

$S'_x = -2.848e-06$

$S'_y = -2.062e-04$

$S'_z = 2.091e-04$

Alignment tensor eigenvectors

$e[x] = (-0.661, 0.680, 0.319)$

$e[y] = (0.007, -0.420, 0.908)$

$e[z] = (0.751, 0.602, 0.273)$

Alignment tensor in laboratory coordinates:

[ 7.768e-05,6.420e-05,2.810e-05]

[ 6.420e-05,2.542e-05,7.481e-05]

[ 2.810e-05,7.481e-05,-1.031e-04]

SVD condition number is 2.051e+00

Axial component Aa = 2.091e-04

Rhombic component Ar = 1.356e-04

Field=11.74 Teslas[ 3.63]

rhombicity R = 0.649

Asimmetry parameter etha =9.728e-01

GDO = 2.930e-04

ZY'Z" Euler Angles (degrees)

Set 1

(38.7,74.2,109.4)

Set 2

(-141.3,-74.2,-70.6)

Calculated Corresponding alignment tensor for gibberellin in  $Ti_3C_2T_x$  MXene with  $CD_3OD/D_2O$ .

Cornilescu Quality factor: 0.0822114

Alignment tensor information:

A'x= 8.581e-05

A'y= 4.514e-04

A'z=-5.372e-04

Saupe tensor

S'x= 1.287e-04

$$S'y = 6.771e-04$$

$$S'z = -8.058e-04$$

Alignment tensor eigenvectors

$$e[x] = (0.865, -0.275, 0.421)$$

$$e[y] = (0.262, 0.961, 0.089)$$

$$e[z] = (-0.429, 0.033, 0.903)$$

Alignment tensor in laboratory coordinates:

$$[-3.629e-06, 1.008e-04, 2.497e-04]$$

$$[1.008e-04, 4.227e-04, 1.292e-05]$$

$$[2.497e-04, 1.292e-05, -4.191e-04]$$

SVD condition number is  $3.327e+00$

Axial component  $A_a = -8.058e-04$

Rhombic component  $A_r = -3.656e-04$

Field = 11.74 Teslas [ 3.63]

rhombicity  $R = 0.454$

Asimmetry parameter  $\eta_a = 6.805e-01$

GDO =  $1.033e-03$

ZY'Z" Euler Angles (degrees)

Set 1

(175.6, 25.5, 168.0)

Set 2

(-4.4, -25.5, -12.0)

Calculated Corresponding alignment tensor for L-proline in  $Ti_3C_2T_x$  MXene with  $D_2O$

(Conformer 1: 35.1%, Conformer 2: 3.6%, Conformer 3: 52.8%, Conformer 4: 1.1%, Conformer 5: 7.4%)

Cornilescu Quality factor: 0.0202586

Alignment tensor information:

$A'_x = -5.925e-05$

$A'_y = -9.820e-04$

$A'_z = 1.041e-03$

Saupe tensor

$S'_x = -8.888e-05$

$S'_y = -1.473e-03$

$S'_z = 1.562e-03$

Alignment tensor eigenvectors

$e[x] = (-0.114, 0.443, 0.889)$

$e[y] = (0.385, -0.805, 0.451)$

$e[z] = (0.916, 0.394, -0.079)$

Alignment tensor in laboratory coordinates:

$[7.274e-04, 6.826e-04, -2.392e-04]$

$[6.826e-04, -4.875e-04, 3.010e-04]$

$[-2.392e-04, 3.010e-04, -2.400e-04]$

SVD condition number is  $3.156e+00$

Axial component  $A_a = 1.562e-03$

Rhombic component  $A_r = 9.227e-04$

Field = 11.74 Teslas [ 3.63]

rhombicity  $R = 0.591$

Asimmetry parameter  $\eta = 8.862e-01$

GDO =  $2.128e-03$

ZY'Z'' Euler Angles (degrees)



Set 1

(23.3,94.5,153.1)

Set 2

(-156.7,-94.5,-26.9)

Calculated Corresponding alignment tensor for L-proline in  $Ti_3C_2T_x$  MXene with DMSO- $d_6$ /D<sub>2</sub>O

(Conformer 1: 35.1%, Conformer 2: 3.6%, Conformer 3: 52.8%, Conformer 4: 1.1%, Conformer 5: 7.4%)

Cornilescu Quality factor: 0.0515514

Alignment tensor information:

A'x=-1.047e-04

A'y=-5.069e-04

A'z= 6.116e-04

Saupe tensor

S'x=-1.571e-04

S'y=-7.603e-04

S'z= 9.174e-04

Alignment tensor eigenvectors

e[x]=(-0.146, 0.249, 0.957)

e[y]=( 0.641,-0.714, 0.283)

e[z]=( 0.754, 0.655,-0.055)

Alignment tensor in laboratory coordinates:

[ 1.372e-04,5.374e-04,-1.028e-04]

[ 5.374e-04,-2.388e-06,5.546e-05]

[-1.028e-04,5.546e-05,-1.348e-04]

SVD condition number is 3.156e+00

Axial component Aa = 9.174e-04

Rhombic component  $A_r = 4.021e-04$

Field=11.74 Teslas[ 3.63]

rhombicity  $R = 0.438$

Asimmetry parameter  $\eta = 6.576e-01$

GDO = 1.168e-03

ZY'Z" Euler Angles (degrees)

Set 1

(41.0,93.2,163.5)

Set 2

(-139.0,-93.2,-16.5)

Calculated Corresponding alignment tensor for Boc-D-Trypophan in  $Ti_3C_2T_x$  MXene with DMSO- $d_6/D_2O$   
(Conformer 1: 9.9%, Conformer 2: 73.2%, Conformer 3: 16.9%)

Cornilescu Quality factor: 0.0598416

Alignment tensor information:

$A'_x = 5.120e-04$

$A'_y = 7.490e-04$

$A'_z = -1.261e-03$

Saupe tensor

$S'_x = 7.680e-04$

$S'_y = 1.124e-03$

$S'_z = -1.891e-03$

Alignment tensor eigenvectors

$e[x] = (0.093, 0.895, -0.437)$

$e[y] = (-0.527, 0.417, 0.741)$

$e[z] = (0.845, 0.162, 0.510)$

Alignment tensor in laboratory coordinates:

$[-6.870e-04, -2.945e-04, -8.567e-04]$

$[-2.945e-04, 5.067e-04, -7.333e-05]$

$[-8.567e-04, -7.333e-05, 1.803e-04]$

SVD condition number is  $4.594e+01$

Axial component  $A_a = -1.891e-03$

Rhombic component  $A_r = -2.370e-04$

Field = 11.74 Teslas [ 3.63]

rhombicity  $R = 0.125$

Asimmetry parameter  $\epsilon_{\theta} = 1.880e-01$

GDO =  $2.203e-03$

ZY'Z'' Euler Angles (degrees)

Set 1

(10.8, 59.3, 59.4)

Set 2

(-169.2, -59.3, -120.6)

Calculated Corresponding alignment tensor for Boc-D-Trypophan in  $Ti_3C_2T_x$  MXene with  $CD_3OD/D_2O$   
(Conformer 1: 9.9%, Conformer 2: 73.2%, Conformer 3: 16.9%)

Cornilescu Quality factor: 0.0850145

Alignment tensor information:

$A'_x = -5.401e-07$

$A'_y = -6.143e-04$

$A'_z = 6.148e-04$

Saupe tensor

$S'_x = -8.102e-07$

$$S'y = -9.214e-04$$

$$S'z = 9.222e-04$$

Alignment tensor eigenvectors

$$e[x] = (-0.201, -0.564, 0.801)$$

$$e[y] = (0.934, 0.136, 0.331)$$

$$e[z] = (-0.296, 0.814, 0.500)$$

Alignment tensor in laboratory coordinates:

$$[-4.819e-04, -2.264e-04, -2.804e-04]$$

$$[-2.264e-04, 3.959e-04, 2.227e-04]$$

$$[-2.804e-04, 2.227e-04, 8.606e-05]$$

SVD condition number is  $1.289e+01$

Axial component  $A_a = 9.222e-04$

Rhombic component  $A_r = 6.137e-04$

Field = 11.74 Teslas [ 3.63]

rhombicity  $R = 0.665$

Asimmetry parameter  $\eta_a = 9.982e-01$

GDO =  $1.303e-03$

ZY'Z" Euler Angles (degrees)

Set 1

(110.0, 60.0, 157.6)

Set 2

(-70.0, -60.0, -22.4)
